# Supplementary material for: Interplay between Constraints, Objectives, and Optimality for Genome-Scale Stoichiometric Models
Source: PLOS journal article supplement (doi:10.1371/journal.pcbi.1004166), 2015-04-07
Supplement: S3 (10.1371/journal.pcbi.1004166.s003) [file journal.pcbi.1004166.s003]

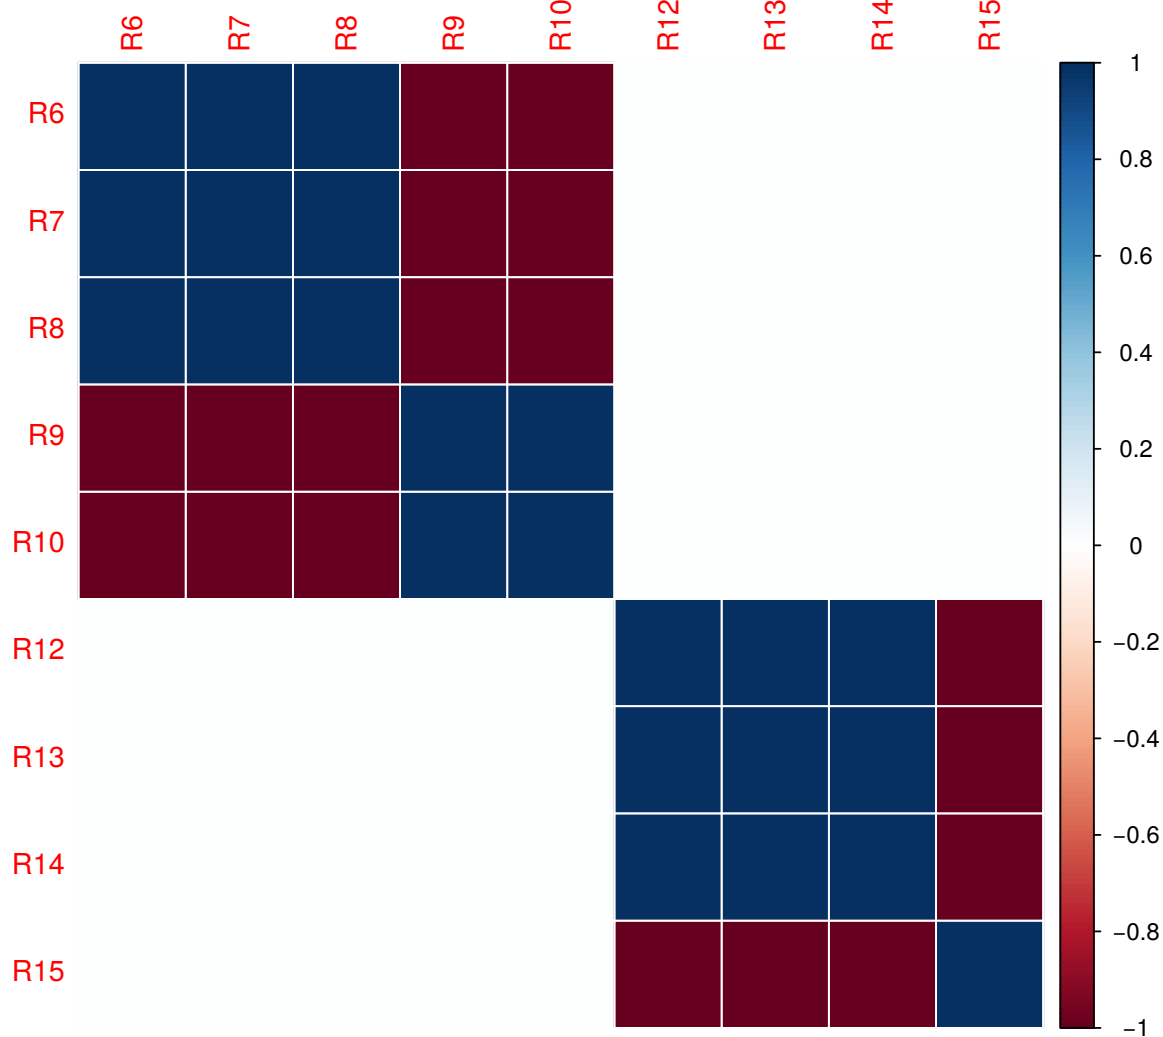

**Figure S2. Subnetworks consist of reactions with correlated flux variability.** We performed vertex correlation analysis on the four vertices (Figure 2B) of our metabolic toy network without reversible-reaction splitting. This figure shows the Pearson correlation coefficients. We can see that there are two subnetworks, {R6-R10} and {R12-R15}. Reactions within the same flux distribution (e.g. R6 and R7) are positively correlated and reactions between alternative flux distributions (e.g. R6 and R10) are negatively correlated.
