# Supplementary material for: Interplay between Constraints, Objectives, and Optimality for Genome-Scale Stoichiometric Models
Source: PLOS journal article supplement (doi:10.1371/journal.pcbi.1004166), 2015-04-07
Supplement: S8 (10.1371/journal.pcbi.1004166.s008) [file journal.pcbi.1004166.s008]

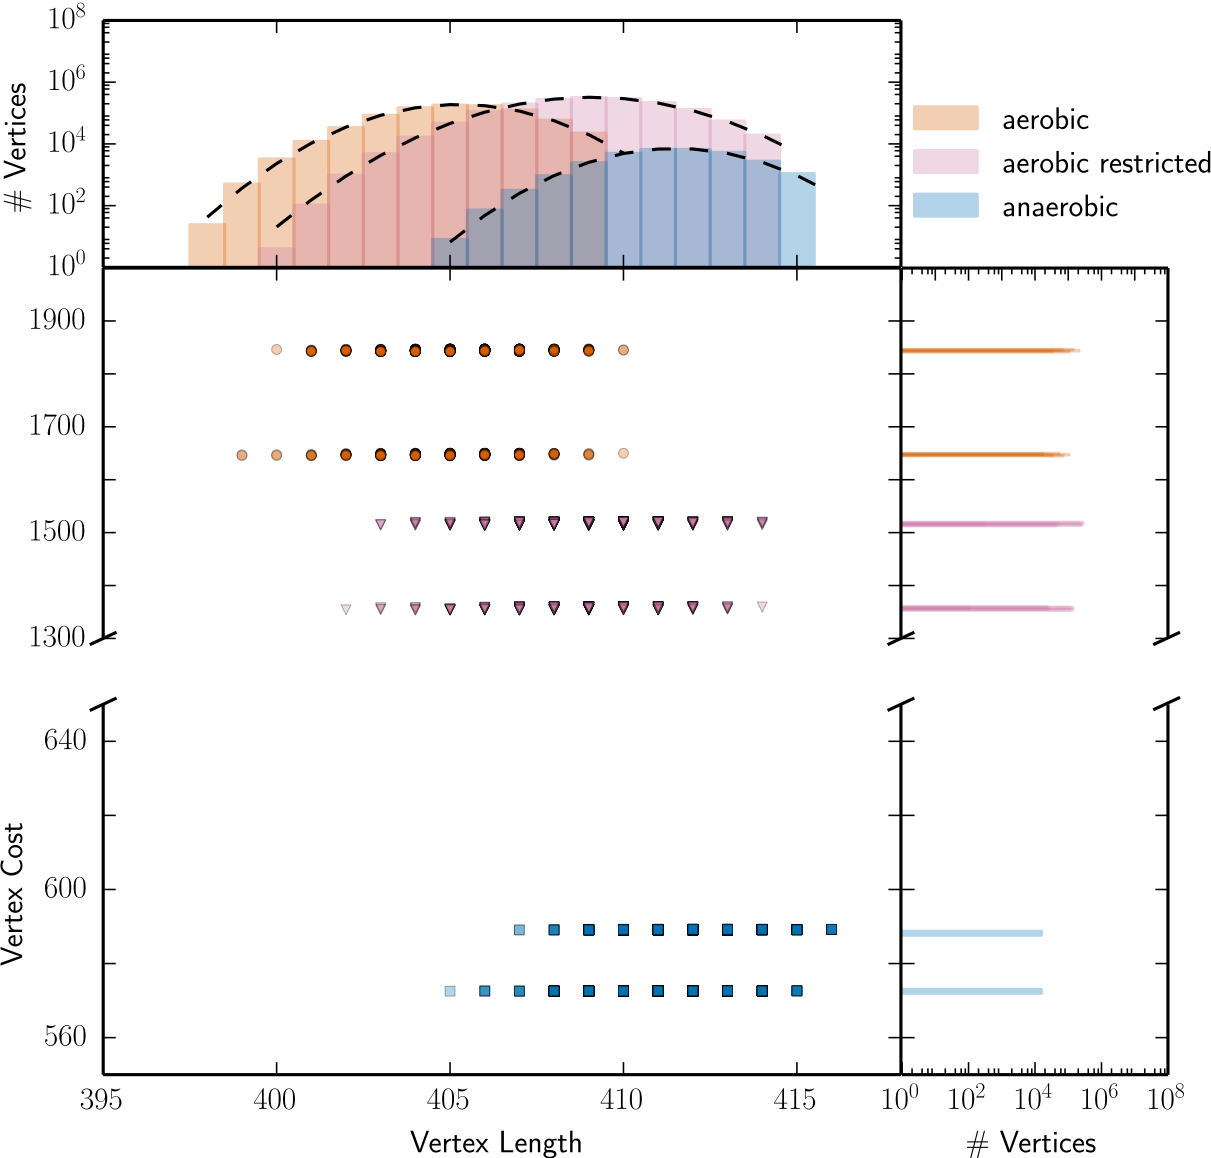

**Figure S7. Different cost distributions after enumerating the model with reversible reactions.** Enumeration of the optimal solution space with reversible reactions did not result in a unique characterization of this space. Different subsets of all non-decomposable optimal flux pathways can, therefore, be used to describe the optimal solution space. This can result in different properties of the set of vertices. Comparison with Figure 5 shows that especially the cost distributions are different. Here, only bimodal distributions were found while also a multimodal distribution was found by enumerating the network with reversible-reaction splitting. Note that due to file size limitations we only show a subset (10,000) of vertices for all conditions in the scatter plot.
